# Supplementary material
Source: publisher figshare collection journal article supplement (https://tandf.figshare.com/articles/dataset/_/24496610)
Supplement: Supplementary file 1 [file 2]

# Appendix to “Metaheuristic Solutions to Order-of-Addition Design Problems” published in the *Journal of Computational and Graphical Statistics*

Zack Stokes, Weng Kee Wong, and Hongquan Xu

Figures S1, S2, and S3 show the comparisons of DE and PSO algorithms for constructing  $A$ -optimal designs under model uncertainty, maximin and minimax distance designs with  $T = 1000$  iterations.

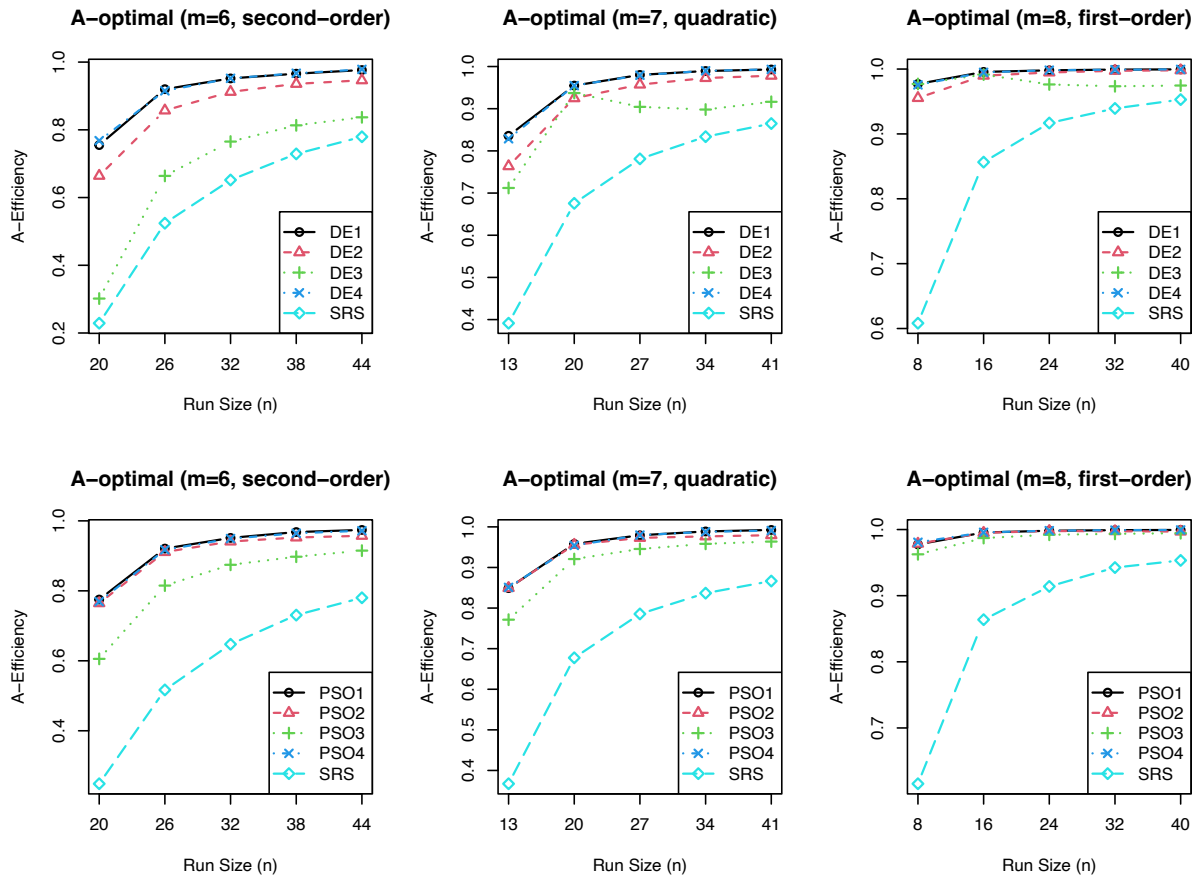

Figure S1: Comparisons of DE, PSO algorithms for constructing  $A$ -optimal designs under model uncertainty (with  $T = 1000$  iterations)

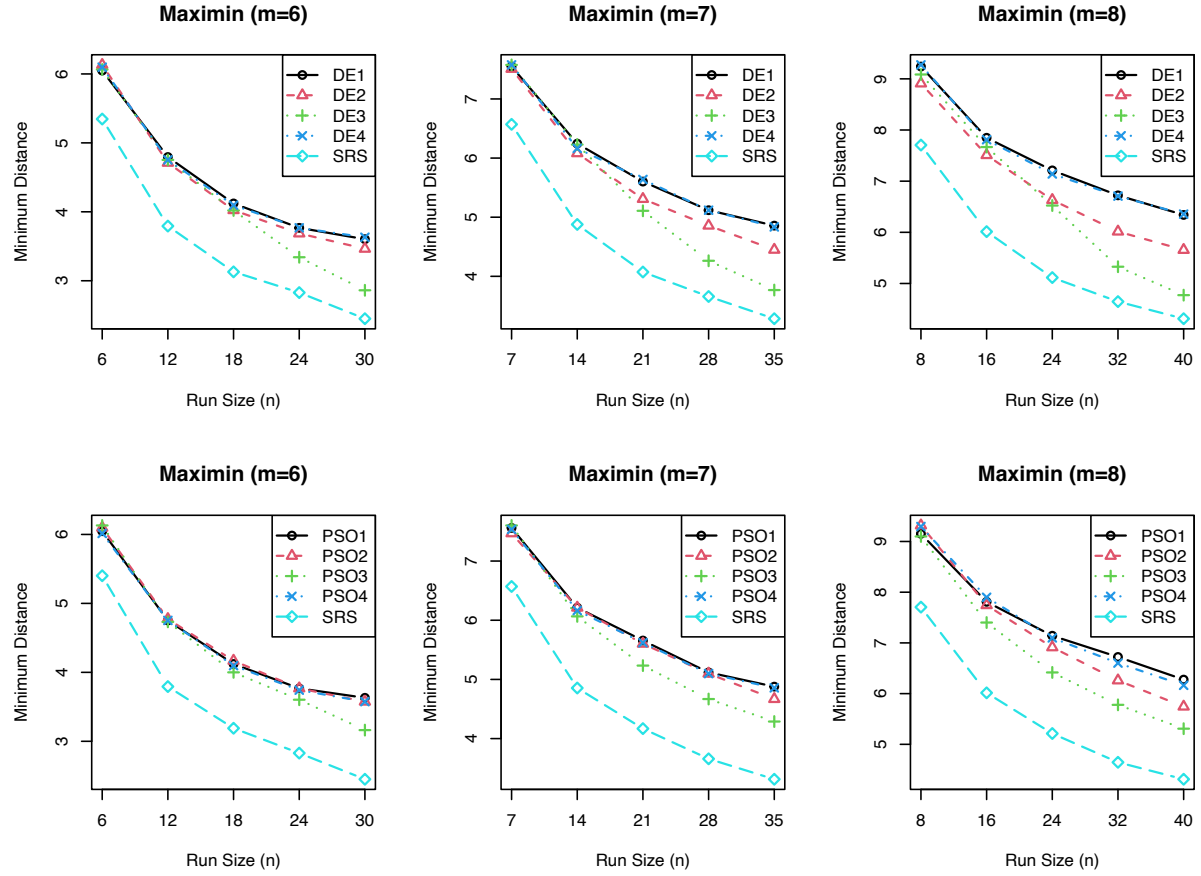

Figure S2: Comparisons of DE, PSO algorithms for constructing maximin distance designs (with  $T = 1000$  iterations)

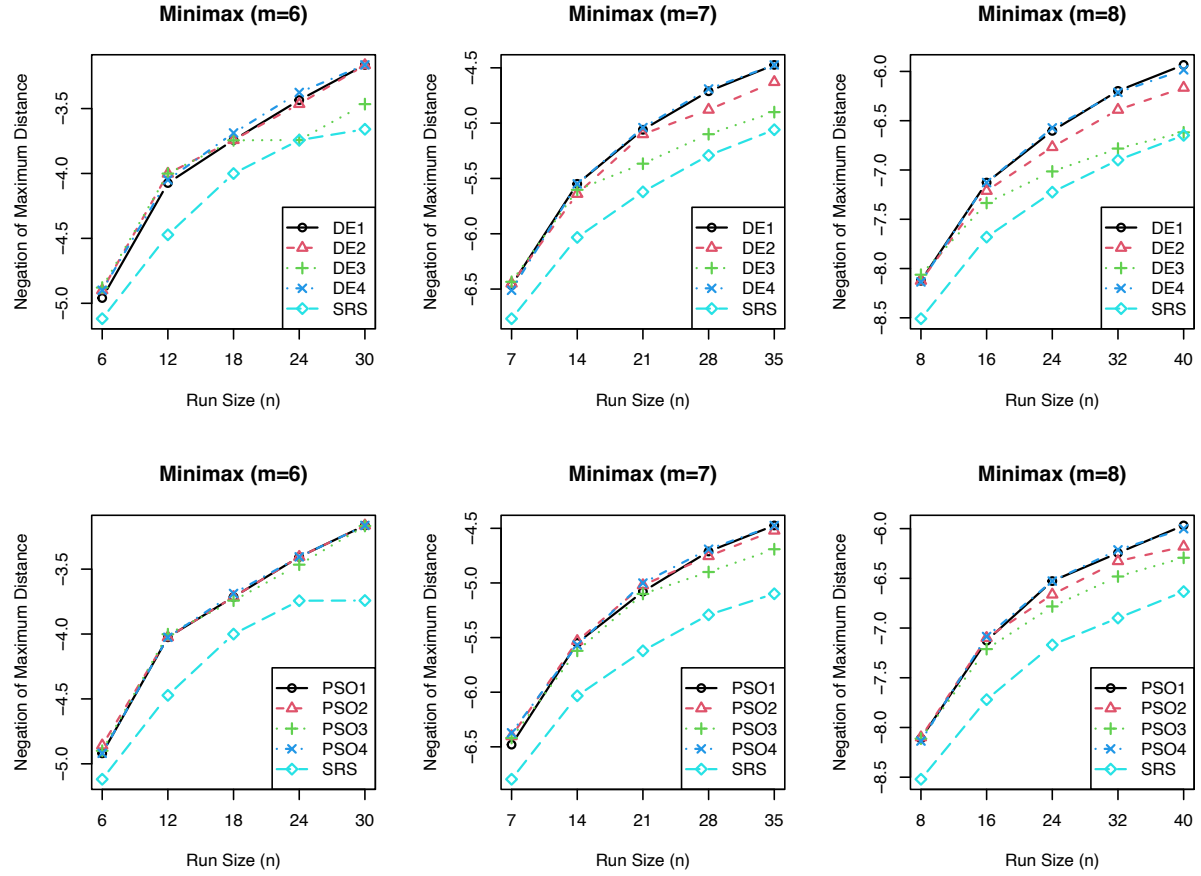

Figure S3: Comparisons of DE, PSO algorithms for constructing minimax distance designs (with  $T = 1000$  iterations)
